# Supplementary material for: Assessment of Spatio-Temporal Variability of Faecal Pollution along Coastal Waters during and after Rainfall Events
Source: MDPI journal article supplement (doi:10.3390/w14030502), 2022-02-08
Supplement: s1 [file s1]

**Table S1.** Dataset of physical, biological, chemical parameters, and Total Suspended Matter (TSM) at the Arzilla River in July-September 2019.

[www.mdpi.com/Table/s1](http://www.mdpi.com/Table/s1)

|          | Salinity  | Temperature<br>(°C) | Chl- <i>a</i><br>(µg l <sup>-1</sup> ) | N-NH <sub>4</sub><br>(µM) | N-NO <sub>3</sub><br>(µM) | N-NO <sub>2</sub><br>(µM) | TN<br>(µM)   | TP<br>(µM) | TSM<br>(mg l <sup>-1</sup> ) |
|----------|-----------|---------------------|----------------------------------------|---------------------------|---------------------------|---------------------------|--------------|------------|------------------------------|
| No. Data | 23        | 23                  | 23                                     | 23                        | 23                        | 23                        | 15           | 15         | 23                           |
| Mean±SE  | 0.42±0.02 | 21.49±0.72          | 11.89±2.07                             | 12.35±4.11                | 131.5±10.11               | 4.03±0.68                 | 205.04±11.22 | 4.08±0.43  | 242.66±36.27                 |
| Minimum  | 0.32      | 16.05               | 1.28                                   | 1.46                      | 60.99                     | 0.47                      | 122.97       | 1          | 74                           |
| Maximum  | 0.51      | 28.85               | 36.99                                  | 70.4                      | 265.45                    | 10.63                     | 311.3        | 8.36       | 515                          |

**Table S2.** Dataset of physical, biological, chemical parameters, and Total Suspended Matter (TSM) along the three transects at the sea in July-September 2019.

[www.mdpi.com/Table/s2](http://www.mdpi.com/Table/s2)

|          | Salinity   | Temperature<br>(°C) | Redox<br>(mV) | pH        | Conductivity<br>(mS cm <sup>-1</sup> ) | D.O.<br>(mg l <sup>-1</sup> ) | Chl <i>a</i><br>(µg l <sup>-1</sup> ) | N-NH <sub>4</sub><br>(µM) | N-NO <sub>3</sub><br>(µM) | N-NO <sub>2</sub><br>(µM) | TSM<br>(mg l <sup>-1</sup> ) |
|----------|------------|---------------------|---------------|-----------|----------------------------------------|-------------------------------|---------------------------------------|---------------------------|---------------------------|---------------------------|------------------------------|
| No. Data | 24         | 24                  | 24            | 24        | 24                                     | 24                            | 24                                    | 24                        | 24                        | 24                        | 24                           |
| Mean±SE  | 29.72±0.57 | 26.40±0.29          | 302.65±12,24  | 8.08±0,01 | 47.20±0.79                             | 6.22±0.09                     | 4.23±1.18                             | 2.01±13.55                | 14.49±2.04                | 0.40±0.05                 | 63.67±13.55                  |
| Minimum  | 20.17      | 24.06               | 197.41        | 7.99      | 32.04                                  | 5.45                          | 0.63                                  | 6.25                      | 1.48                      | 0.19                      | 6.25                         |
| Maximum  | 33.03      | 31.59               | 427.84        | 8.17      | 52.01                                  | 7.18                          | 24.1                                  | 285.71                    | 34.88                     | 1.29                      | 285.71                       |

**Table S3.** Dataset of physical, biological, chemical parameters, Total Suspended Matter (TSM) and Particulate Organic Matter (POM) at the Arzilla River in July, August and September 2020.

[www.mdpi.com/Table/s3](http://www.mdpi.com/Table/s3)

|          | Salinity  | Temperature<br>(°C) | Chl <i>a</i><br>(µg l <sup>-1</sup> ) | N-NH <sub>4</sub><br>(µM) | N-NO <sub>3</sub><br>(µM) | N-NO <sub>2</sub><br>(µM) | TN<br>(µM)   | P-PO <sub>4</sub><br>(µM) | TP<br>(µM)  | TSM<br>(mg l <sup>-1</sup> ) | POM<br>(mg l <sup>-1</sup> ) |
|----------|-----------|---------------------|---------------------------------------|---------------------------|---------------------------|---------------------------|--------------|---------------------------|-------------|------------------------------|------------------------------|
| No. Data | 36        | 36                  | 36                                    | 36                        | 36                        | 36                        | 36           | 36                        | 36          | 36                           | 36                           |
| Mean±SE  | 8.39±1.31 | 22.55±0.30          | 14.27±2.24                            | 32.87±4.08                | 176.91±15.70              | 9.84± 0.66                | 292.65±15.43 | 0.90± 0.13                | 5.30 ± 0.72 | 100.55±26.29                 | 12.52±1.76                   |
| Minimum  | 0.64      | 19.41               | 0.20                                  | 2                         | 38.85                     | 3.61                      | 161.49       | 0.10                      | 0.22        | 15.33                        | 2.6                          |
| Maximum  | 23.48     | 25.66               | 53.67                                 | 88.45                     | 379.71                    | 17.88                     | 481.77       | 3.23                      | 22.07       | 353.73                       | 60                           |

**Table S4.** Dataset of physical, biological, chemical parameters, and Total Suspended Matter (TSM) and Particulate Organic Matter (POM) along the three transects at the sea in July, August, and September 2020.

[www.mdpi.com/Table/s4](http://www.mdpi.com/Table/s4)

|          | Salinity  | Temperature<br>(°C) | Redox<br>(mV) | pH        | Conductivity<br>(mS cm <sup>-1</sup> ) | D.O.<br>(mg l <sup>-1</sup> ) | Chl <i>a</i><br>(µg l <sup>-1</sup> ) | N-NH <sub>4</sub><br>(µM) | N-NO <sub>3</sub><br>(µM) | N-NO <sub>2</sub><br>(µM) | TN<br>(µM) | P-PO <sub>4</sub><br>(µM) | TP<br>(µM) | TSM<br>(mg l <sup>-1</sup> ) | POM<br>(mg l <sup>-1</sup> ) |
|----------|-----------|---------------------|---------------|-----------|----------------------------------------|-------------------------------|---------------------------------------|---------------------------|---------------------------|---------------------------|------------|---------------------------|------------|------------------------------|------------------------------|
| No. Data | 27        | 27                  | 27            | 27        | 27                                     | 27                            | 27                                    | 27                        | 27                        | 27                        | 27         | 27                        | 27         | 27                           | 27                           |
| Mean±SE  | 32.5±0.59 | 25.26±0.27          | 183.94±7.7    | 8.13±0.01 | 50.02±0.85                             | 6.36±0.08                     | 4.12±1.22                             | 2.69±0.53                 | 11.1±1.95                 | 0.51±0.06                 | 40.53±3.94 | 0.12±0.02                 | 1.44±0.27  | 50.14±8.23                   | 9.12±1.33                    |
| Minimum  | 25.37     | 23.27               | 111.8         | 8.02      | 40.44                                  | 5.5                           | 0.2                                   | 0.52                      | 2.27                      | 0.04                      | 16.27      | 0.01                      | 0.31       | 9.5                          | 2                            |
| Maximum  | 36.59     | 27.19               | 255.1         | 8.26      | 54.95                                  | 6.89                          | 33.26                                 | 10.89                     | 33.35                     | 1.34                      | 82.97      | 0.51                      | 6.68       | 186.92                       | 34                           |

**Table S5.** Meteorological-marine conditions during the five events (2019-2020).

[www.mdpi.com/Table/s5](http://www.mdpi.com/Table/s5)

| Sampling data<br>(day/month/year) | Wind speed<br>(m/s) | Wind gust<br>(m/s) | Wind direction | Sea tide<br>(mm) |
|-----------------------------------|---------------------|--------------------|----------------|------------------|
| 11/07/2019                        | na                  | na                 | na             | 100              |
| 03/09/2019                        | 0.81                | 1.37               | North-East     | 120              |
| 05/09/2019                        | 1.27                | 1.6                | North-East     | 130              |
| 06/09/2019                        | 0.76                | 1.16               | North          | 190              |
| 17/07/2020                        | 2.73                | 3.58               | North          | 5                |
| 18/07/2020                        | 3.57                | 3.89               | North          | 4                |
| 04/08/2020                        | 1.78                | 2.59               | West           | 22               |
| 06/08/2020                        | 4.51                | 5.19               | North-West     | 12               |
| 01/07/2020                        | 1.61                | 2.55               | West           | 11               |

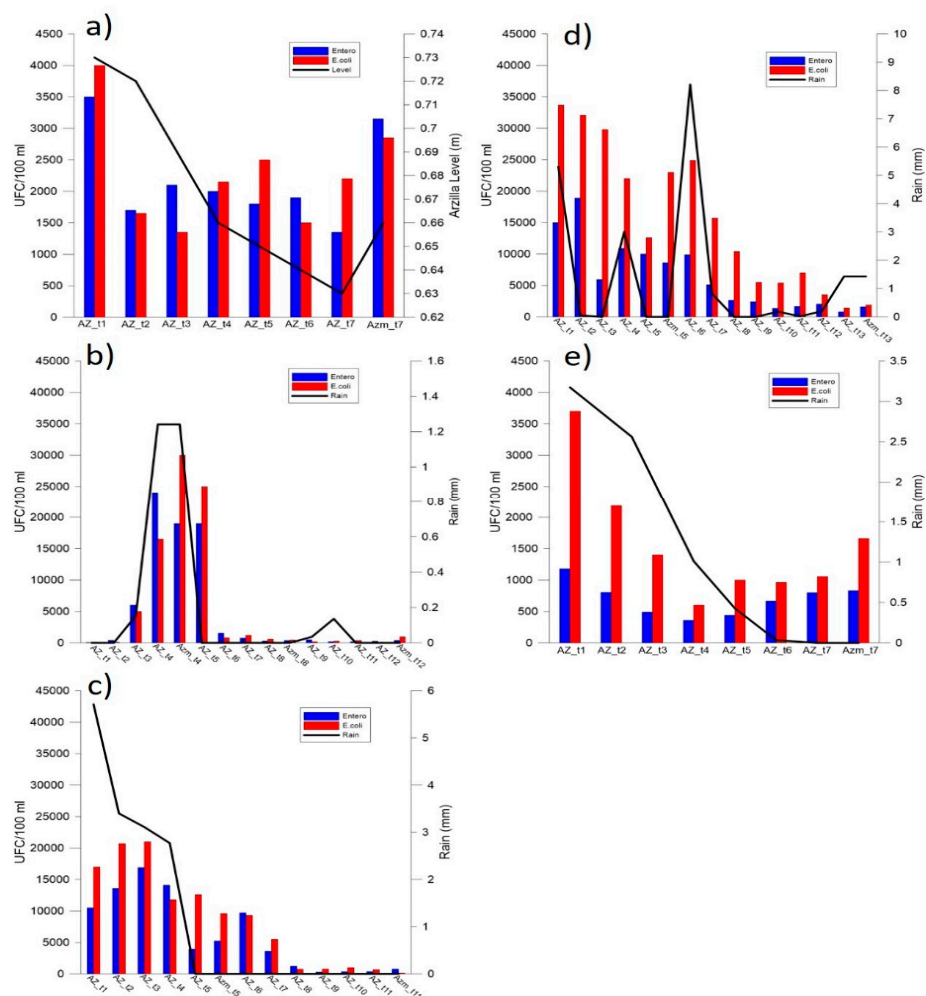

**Figure S1.** Temporal trends (from  $t1$  to  $t_n$ ) of microbial faecal distribution (*E. coli* and enterococci) and rainfall in the site of Arzilla River (AZ) and in Arzilla mouth (AZm) after the 5 sampling events: 10-11 July 2019 (a); 3-5-6 September 2019 (b); 17-18 July 2020 (c); 4-6 August 2020 (d); 1 September 2020 (e); mm of rainfall in Fig. (b),(c),(d),(e) and Arzilla level in metres in Fig. (a). [www.mdpi.com/Figure/s1](http://www.mdpi.com/Figure/s1)

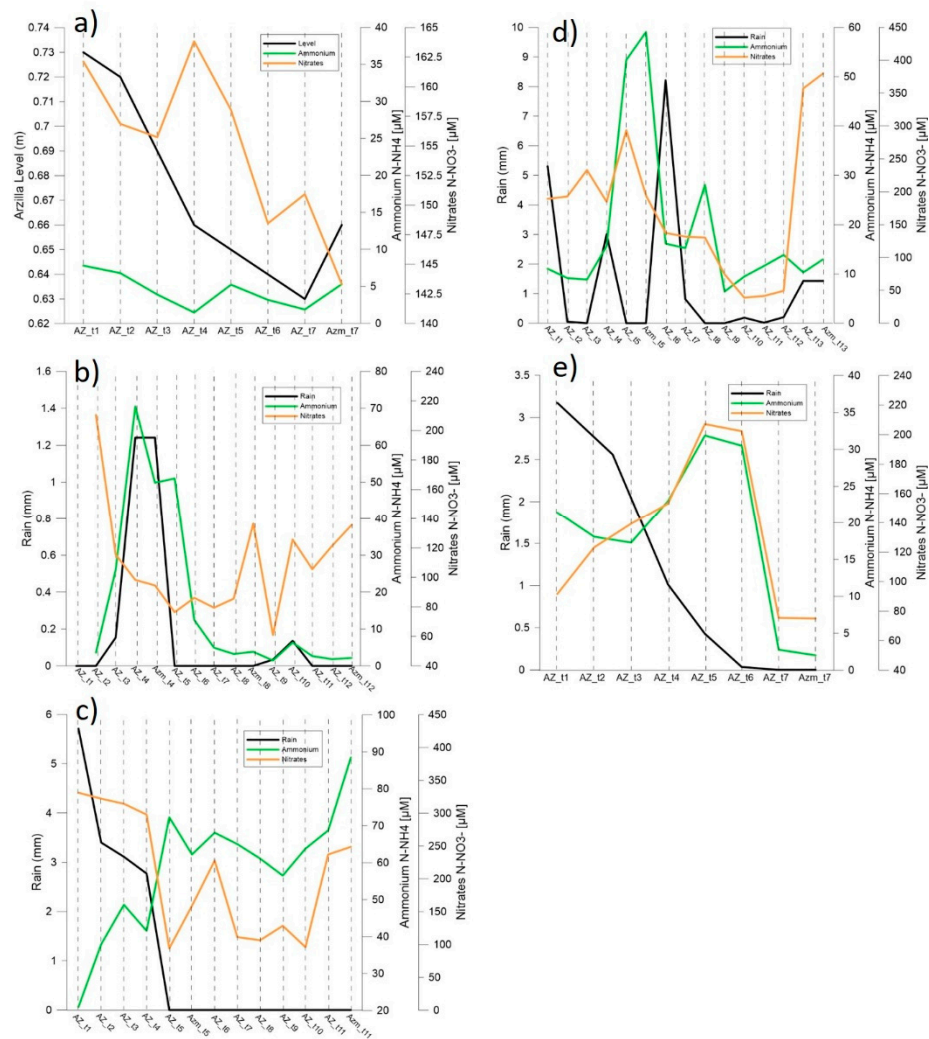

**Figure S2.** Temporal trends (from  $t_1$  to  $t_n$ ) of nutrient distribution (ammonium and nitrates) and rainfall in the site of Arzilla River (AZ) and in Arzilla mouth (AZm) after the 5 sampling events: 10-11 July 2019 (a); 3-5-6 September 2019 (b); 17-18 July 2020 (c); 4-6 August 2020 (d); 1 September 2020 (e); mm of rainfall in Fig. (b),(c),(d),(e) and Arzilla level in metres in Fig (a). [www.mdpi.com/Figure/s2](http://www.mdpi.com/Figure/s2)

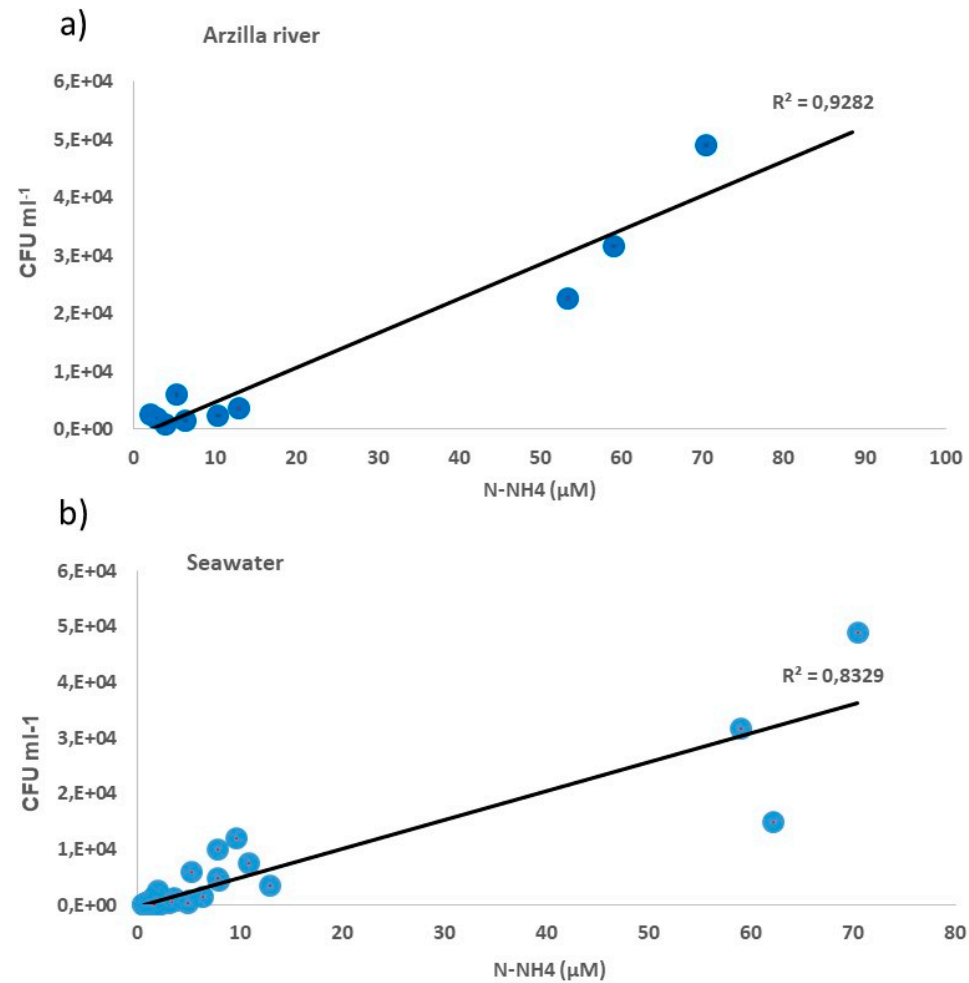

**Figure S3.** Relationship between total faecal bacteria (*E.coli* + enterococci) and ammonium (N-NH<sub>4</sub>) in Arzilla River (a) and seawater (b). Slopes of the linear regression are also given. [www.mdpi.com/Figure/s3](http://www.mdpi.com/Figure/s3)
